# Supplementary material for: Grape Seed Proanthocyanidins Modulate the Hepatic Molecular Clock via MicroRNAs
Source: PubMed Central journal article supplement — Mol Nutr Food Res. 2022 Oct 26;66(23):2200443. doi: 10.1002/mnfr.202200443 (PMC10078170; doi:10.1002/mnfr.202200443), 2022-10-26
Supplement: MNFR-66-0-s001.pdf [file MNFR-66-0-s001.pdf]

## 1 **Supplementary material**

2

### 3 **2.6. RNA extraction and cDNA synthesis**

4 Total RNA, containing small RNAs, was extracted from frozen liver and from cell culture using a  
5 mi/mRNA extraction kit (miRNA kit, E.Z.N.A., Omega Bio-tek, Norcross, U.S.A), according to the  
6 manufacturer's protocol. To isolate both total RNA and miRNA 1 equivalent of absolute ethanol was  
7 added instead of recommended 0.33 equivalent at step 7. The washing step was performed according  
8 to the protocol for isolating large RNAs. The concentration of the purified RNA was determined using a  
9 Nanodrop 1000 Spectrophotometer (Fischer Bioblock Scientific, France).

### 10 **2.7. mRNA quantification by RT-qPCR**

11 To analyse the expression of each mRNA, reverse transcription was performed using TaqMan mRNA  
12 reverse transcription kit (Fisher Scientific, Madrid, Spain). For the reverse transcription a My gene L  
13 series Peltier Thermal Cycler was used; the reaction was performed at 25 °C for 10 min, 37°C for 120  
14 min and 85 °C for 5 min. The final total concentration was 50 ng/μL. We used 22.5 μL of the resulting  
15 diluted cDNA solution for subsequent RT-qPCR amplification using the hydrolysis probe (Taqman  
16 pPCR master mix; Applied Biosystem, Madrid, Spain). The following probes were used for each gene:  
17 *Bmal1* (Hs00154147\_m1) and *Nampt* (Hs00237184\_m1). The results were normalized to cyclophilin  
18 (PPIA: Hs99999904\_m1), which was used as *reference gene*. Amplification was performed using the  
19 ABI Prism 7300 SDS Real-Time PCR system (Applied Biosystems, Madrid, Spain) at 50 °C for 2 min,  
20 95 °C for 10 min followed by 40 cycles of 95 °C for 15 s and 60 °C for 1 min. The fold change in the  
21 mRNA level was calculated by a log 2 scale according to the equation  $2^{-\Delta\Delta Cq}$ , being Cq  
22 quantification cycle.

### 23 **2.8. microRNA quantification by real-time quantitative real-time polymerase chain reaction** 24 **(RT-qPCR)**

25 To analyse the expression of each miRNA, reverse transcription was performed using TaqMan  
26 microRNA reverse transcription kit (Fisher Scientific) and the miRNA-specific reverse transcription  
27 primers provided with the TaqMan microRNA assay (Fisher Scientific). For the reverse transcription a  
28 "My gene L series" Peltier thermal cycler was used; the reaction was performed at 16 °C for 30 min,  
29 42 °C for 30 min and 85 °C for 5 min. 1.33 μL of resulting diluted cDNA were used in a subsequent RT-  
30 qPCR amplification using a hydrolysis probe (Taq-Man universal PCR master mix; Applied Biosystem)  
31 and the associated specific probes provided in the TaqMan microRNA assay kit (Applied Biosystem).  
32 The following specific hydrolysis probes were used for each gene: microRNA-27b-3p (MI0000440), a  
33 microRNA target of *Bmal1* (NM\_001030272.2) and microRNA-34a (MI0000268), target of *Nampt*  
34 (NM\_005746.2). The results were normalized to the expression of the U6 small nuclear RNA  
35 (NR\_004394), which was used as *reference*. Amplification was performed using the ABI Prism 7300  
36 SDS Real-Time PCR system (Applied Biosystems) at 95 °C for 10 min, followed by 40 cycles of 95 °C  
37 for 15 s and 60 °C for 1 min. The fold change in the miRNA level was calculated by a log 2 scale

38 according to the equation  $2^{-\Delta\Delta Cq}$ , where  $\Delta Cq = Cq \text{ miRNA} - Cq \text{ U6}$  and  $\Delta\Delta Cq = \Delta Cq \text{ treated}$   
 39  $\text{samples} - \Delta Cq \text{ untreated controls}$ .

40

41

42 Table S1. Individual phenolic compounds of the grape seed proanthocyanidins extract determined by  
 43 reverse-phase HPLC-MS.

44

| Phenolic compounds                | m/z     | total amount mg/g extract* |
|-----------------------------------|---------|----------------------------|
| Gallic acid                       | 169.01  | 35.16 ± 2.85               |
| Protocatechuic acid               | 153.01  | 2.19 ± 0.14                |
| Vanillic acid                     | 167.03  | 0.15 ± 0.2                 |
| Procyanidin dimer <sup>a</sup>    | 577.13  | 87.51 ± 2.71               |
| Catechin                          | 289.07  | 58.36 ± 2.7                |
| Epicatechin                       | 289.07  | 50.35 ± 1.26               |
| p-coumaric acid                   | 163.03  | 0.14 ± 0.08                |
| dimer gallate <sup>b</sup>        | 729.14  | 4.64 ± 0.49                |
| Epigallocatechin gallate          | 457.07  | n.d.                       |
| Procyanidin trimer <sup>a</sup>   | 865.19  | 9.77 ± 0.5                 |
| Procyanidin tetramer <sup>a</sup> | 1153.26 | n.d.                       |
| Epicatechin Gallate <sup>b</sup>  | 441.08  | 1.86 ± 0.07                |
| Quercetin-3-O-galactoside         | 463.08  | 0.20 ± 0.01                |
| Narigenin-7-glucoside             | 433.11  | 0.25 ± 0.04                |
| Kaempferol-3-glucoside            | 447.09  | n.d.                       |
| Quercetin                         | 301.03  | 0.20 ± 0.11                |

45 \*Values are expressed as mg compound/ g extract ± standard deviation. n.d.: non detected. <sup>a</sup>  
 46 quantified using calibration curve of proanthocyanidins dimer. <sup>b</sup> quantified using the calibration curve  
 47 of epicatechin gallate

48

49

50

51 Table S2. Comparative analysis of the estimated circadian rhythm of *Bmal1*, *Nampt*, miR-27b-3p, miR-  
 52 34a expression obtained by cosinor-based method.

53

| Groups              | p     | d_Amplitude | p(d_Amplitude) | d_Acrophase | p(d_Acrophase) |
|---------------------|-------|-------------|----------------|-------------|----------------|
| <b><i>Bmal1</i></b> |       |             |                |             |                |
| CD vs. CJL          | 0.000 | -4.857      | 0.891          | 0.480       | 0.292          |
| CD vs. TJL          | 0.000 | -6.938      | 0.842          | 0.327       | 0.456          |
| CJL vs. TJL         | 0.000 | -2.081      | 0.930          | -0.152      | 0.685          |
| <b>miR-27b-3p</b>   |       |             |                |             |                |
| CD vs. CJL          | 0.273 | 0.228       | 0.243          | 0.024       | 0.978          |
| CD vs. TJL          | 0.004 | 0.599       | 0.013          | 0.299       | 0.778          |
| CJL vs. TJL         | 0.004 | 0.371       | 0.219          | 0.274       | 0.508          |
| <b><i>Nampt</i></b> |       |             |                |             |                |
| CD vs. CJL          | 0.000 | 0.224       | 0.009          | -0.218      | 0.163          |

|                |       |        |       |        |       |
|----------------|-------|--------|-------|--------|-------|
| CD vs. TJL     | 0.000 | -0.006 | 0.947 | -0.204 | 0.207 |
| CJL vs. TJL    | 0.000 | -0.230 | 0.002 | 0.013  | 0.895 |
| <b>miR-34a</b> |       |        |       |        |       |
| CD vs. CJL     | 0.152 | -0.083 | 0.792 | 0.268  | 0.697 |
| CD vs. TJL     | 0.220 | -0.208 | 0.482 | 2.389  | 0.097 |
| CJL vs. TJL    | 0.835 | -0.125 | 0.736 | 2.121  | 0.168 |

54
